# Supplementary material for: Application of a Heuristic Framework for Multilevel Interventions to Eliminate the Impact of Unjust Social Processes and Other Harmful Social Determinants of Health
Source: PubMed Central journal article supplement (PMC11239765; doi:10.1007/s11121-024-01658-x), 2024-04-12
Supplement: 11121_2024_1658_MOESM1_ESM.pdf [file 11121_2024_1658_MOESM1_ESM.pdf]

**Supplementary Materials for**  
**Application of a Heuristic Framework for Multilevel Interventions to**  
**Eliminate the Impact of Unjust Social Processes and Other Harmful**  
**Social Determinants of Health**

**This PDF file includes:**

Figure S1

Photos S1 – S2

**Figure S1.** The Center for Latino Adolescent and Family Health (CLAFH) Nurse-Led Model of Care

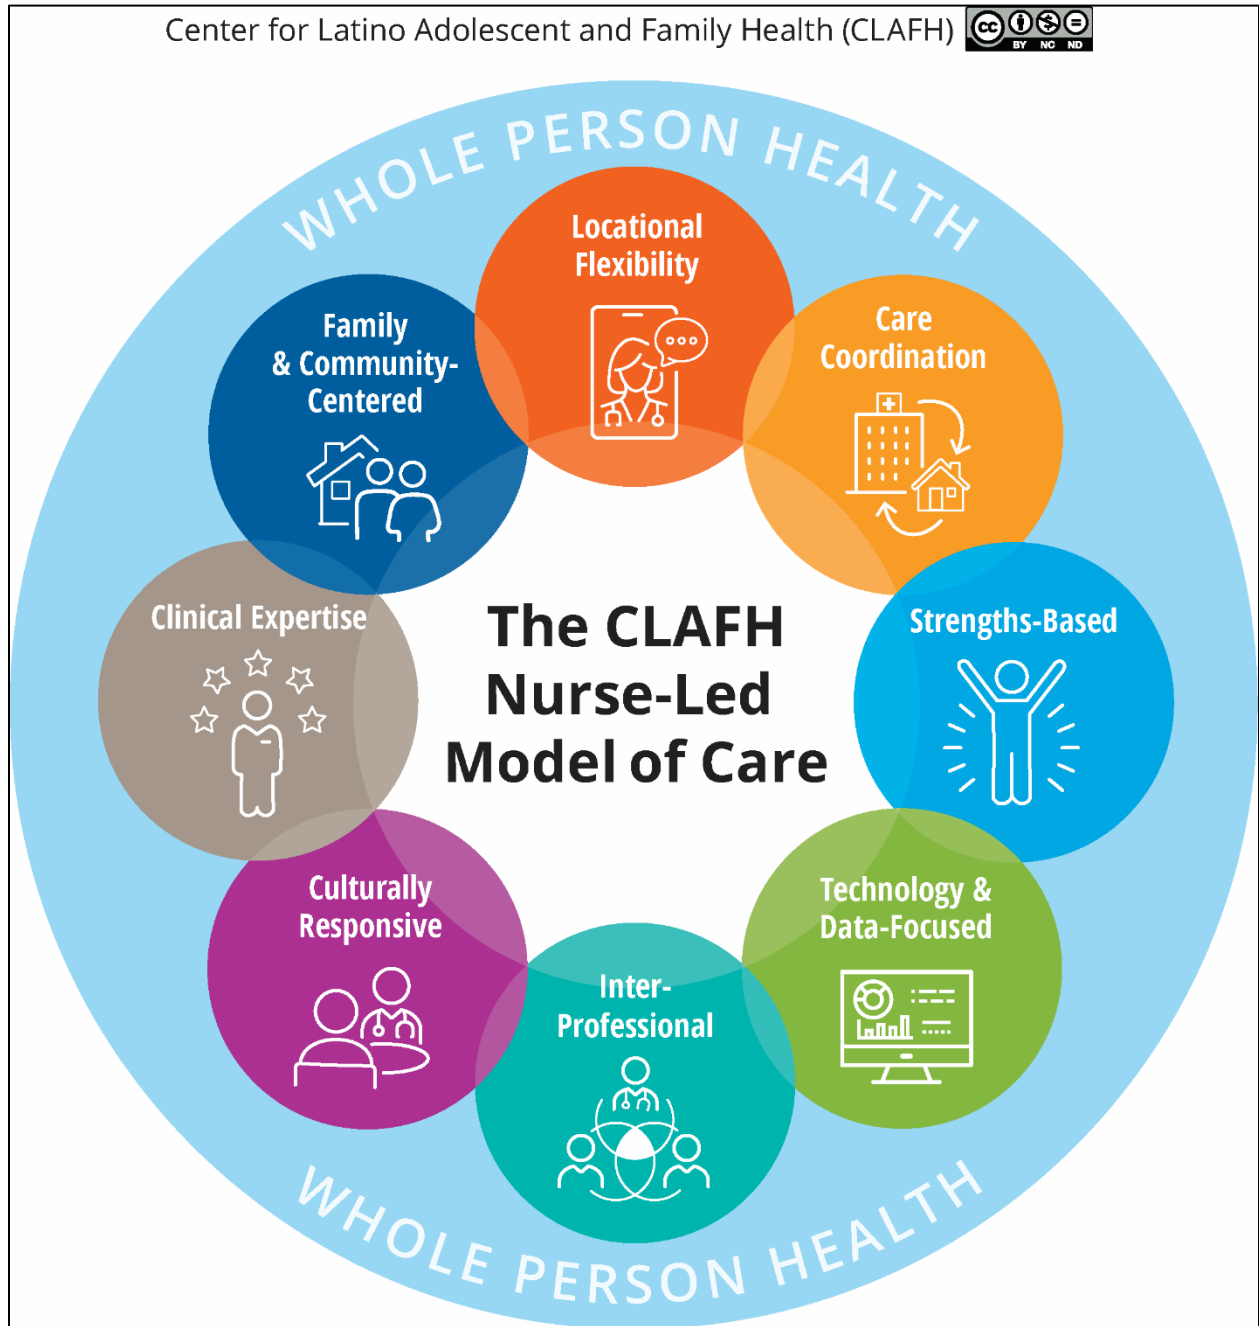

**Photo S1.**

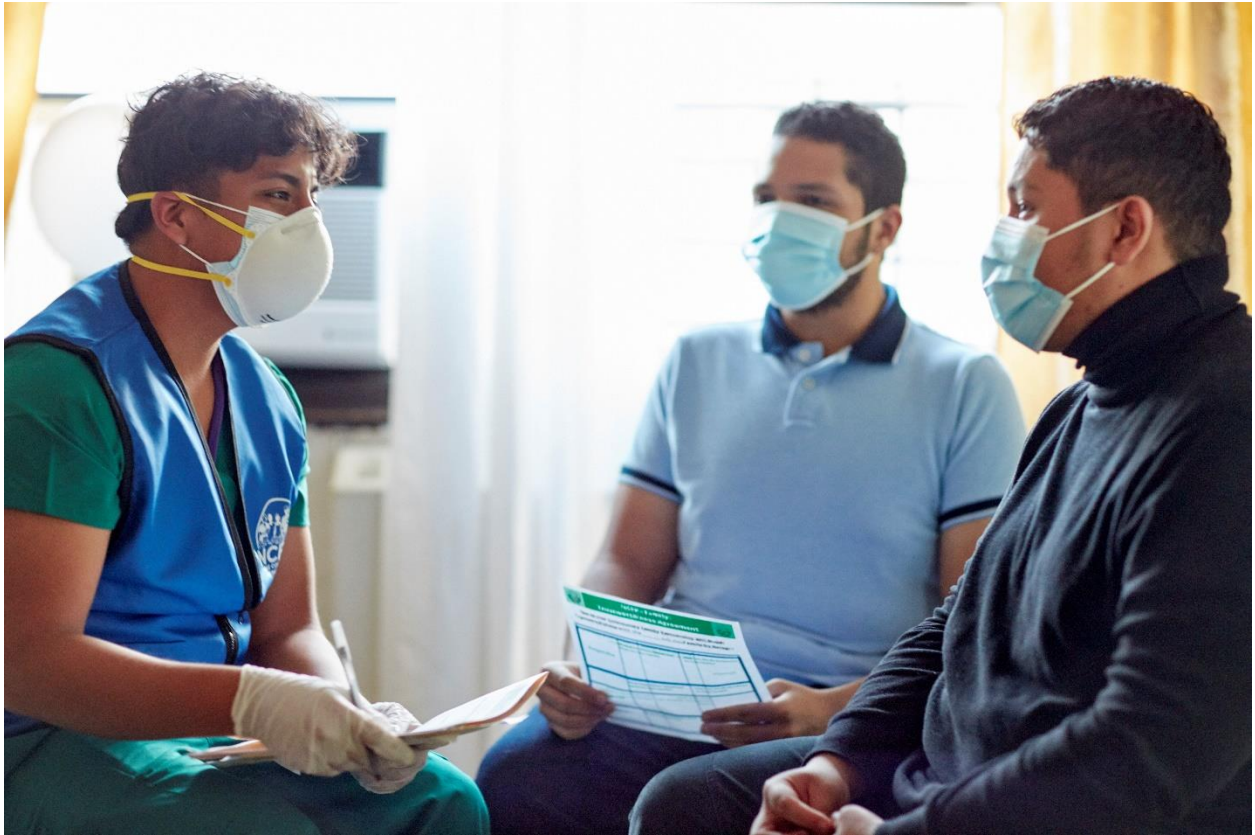

Photo Credit: Matthew Septimus

An NCFP community health worker (left) and family members collaboratively develop the NCFP Trustworthiness Agreement, an intervention element designed to foster meaningful community engagement.

**Photo S2.**

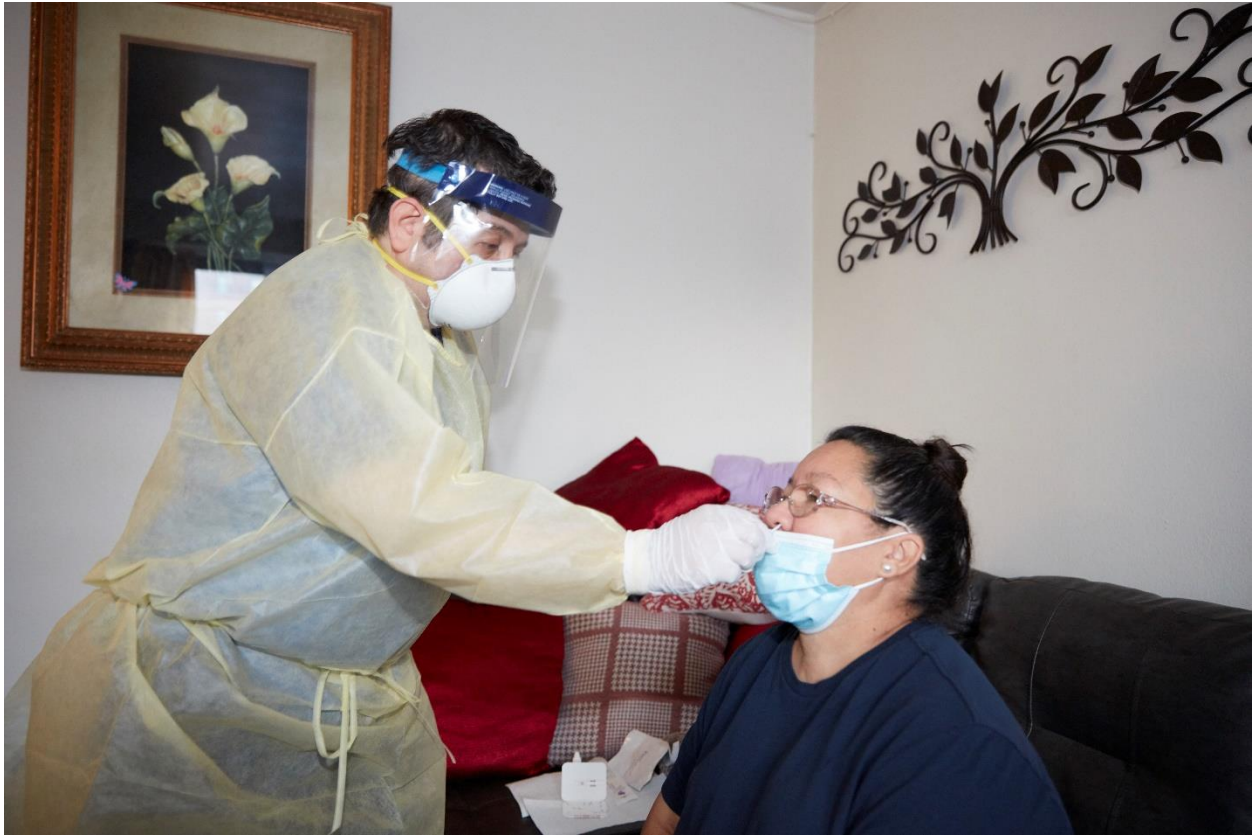

Photo Credit: Matthew Septimus

NCFP nurse collects a lower nasal swab for at-home rapid antigen COVID-19 testing (indicated testing, offered if a participant experiences symptoms consistent with COVID-19 or has had an exposure).
